# Supplementary material for: Element-centric clustering comparison unifies overlaps and hierarchy
Source: PubMed Central journal article supplement (PMC6561975; doi:10.1038/s41598-019-44892-y), 2019-06-12
Supplement: 41598_2019_44892_MOESM1_ESM.pdf [file 41598_2019_44892_MOESM1_ESM.pdf]

# Supplemental Information

## Element-centric clustering comparison unifies overlaps and hierarchy

Alexander J. Gates<sup>1</sup>, Ian B. Wood<sup>2,3</sup>, William P. Hetrick<sup>4</sup>, and Yong-Yeol Ahn<sup>2,3,5</sup>

<sup>1</sup>Department of Physics, Northeastern University. Boston, MA

<sup>2</sup>Department of Informatics, Indiana University. Bloomington, IN

<sup>3</sup>Center for Complex Networks and Systems Research, Indiana University. Bloomington, IN

<sup>4</sup>Department of Psychological and Brain Sciences, Indiana University. Bloomington, IN

<sup>5</sup>Program in Cognitive Science, Indiana University. Bloomington, IN

### Contents

|                                                      |          |
|------------------------------------------------------|----------|
| <b>S1 Clusterings</b>                                | <b>2</b> |
| <b>S2 Existing measures of clustering similarity</b> | <b>2</b> |
| S2.1 Rand Index                                      | .2       |
| S2.2 Adjusted Rand index (ARI)                       | .3       |
| S2.3 Omega index                                     | .3       |
| S2.4 Jaccard index                                   | .4       |
| S2.5 F measure                                       | .4       |
| S2.6 Fowlkes-Mallows index                           | .4       |
| S2.7 Percentage Matching                             | .4       |
| S2.8 Normalized mutual information (NMI)             | .4       |
| S2.9 Overlapping NMI (ONMI)                          | .6       |
| S2.10 Variation of Information VI                    | .6       |
| S2.11 Information Theoretic Intuition                | .7       |
| <b>S3 Datasets</b>                                   | <b>7</b> |
| S3.1 Point clusters                                  | .7       |
| S3.2 Handwriting digits                              | .8       |
| S3.3 Brain networks                                  | .8       |
| <b>References</b>                                    | <b>9</b> |

## 421 S1 Clusterings

422 Throughout this work, we focus on the grouping of elements (i.e. data points or vertices) into clusters (the groups). The  
 423 set of clusters is called a *clustering*. Specifically, given a set of  $N$  distinct elements  $V = \{v_1, \dots, v_N\}$ , a clustering is  
 424 a set  $\mathcal{C} = \{C_1, \dots, C_{K_{\mathcal{C}}}\}$  of  $K_{\mathcal{C}}$  non-empty subsets of  $V$  such that every element  $v_i$  in  $V$  is in at least one cluster  $C_{\beta}$ :  
 425  $\forall v_i \in V \exists C_{\beta}$  s.t.  $v_i \in C_{\beta}$ .

426 We consider three classes of clusterings. A *partition*, or disjoint clustering, is a clustering in which all elements are  
 427 members of one, and only one, cluster. An *overlapping* clustering allows elements to be members of multiple clusters.  
 428 *Hierarchical* clusterings capture the nested organization of clusters at different scales and are accompanied by a directed  
 429 acyclic graph (or dendrogram) showing the hierarchical relationships between clusters.

## 430 S2 Existing measures of clustering similarity

431 Here, we focus on ten of the most prominent measures from the clustering literature: the Rand index, the adjusted Rand  
 432 index, the Omega index, the Jaccard index, the F measure, the Fowlkes Mallows index, percentage matching (PM),  
 433 normalized mutual information (NMI), overlapping normalized mutual information (ONMI), variation of information  
 434 (VI). All of these measures are implemented in the CluSim python package<sup>1</sup>.

### 435 S2.1 Rand Index

436 The Rand index<sup>2</sup> counts the number of element pairs which are either members of the same cluster, or members of  
 437 different clusters in both clusterings. The most common formulation of the Rand index focuses on the following four  
 438 sets of the  $\binom{N}{2}$  element pairs:  $N_{11}$  the number of element pairs which are grouped in the same cluster in both clusterings,  
 439  $N_{10}$  the number of element pairs which are grouped in the same cluster by  $\mathcal{A}$  but in different clusters by  $\mathcal{B}$ ,  $N_{01}$  the  
 440 number of element pairs which are grouped in the same cluster by  $\mathcal{B}$  but in different clusters by  $\mathcal{A}$ , and  $N_{00}$  the number  
 441 of element pairs which are grouped in different clusters by both  $\mathcal{A}$  and  $\mathcal{B}$ . Intuitively,  $N_{11}$  and  $N_{00}$  are indicators of the  
 442 agreement between the two clusterings, while  $N_{10}$  and  $N_{01}$  reflect the disagreement between the clusterings.

443 The aforementioned pair counts are identified from the contingency table  $\mathcal{T}$  between two clusterings, shown in  
 444 Table S1, by the following set of equations:

$$\begin{aligned}
 445 \quad N_{11} &= \sum_{k,m=1}^{K_{\mathcal{A}}, K_{\mathcal{B}}} \binom{n_{km}}{2} = \frac{1}{2} \left( \sum_{k,m=1}^{K_{\mathcal{A}}, K_{\mathcal{B}}} n_{km}^2 - N \right) & (S1) \\
 446 \quad N_{10} &= \sum_{k=1}^{K_{\mathcal{A}}} \binom{a_k}{2} - N_{11} = \frac{1}{2} \left( \sum_{k=1}^{K_{\mathcal{A}}} a_k^2 - \sum_{k,m=1}^{K_{\mathcal{A}}, K_{\mathcal{B}}} n_{km}^2 \right) \\
 447 \quad N_{01} &= \sum_{m=1}^{K_{\mathcal{B}}} \binom{b_m}{2} - N_{11} = \frac{1}{2} \left( \sum_{m=1}^{K_{\mathcal{B}}} b_m^2 - \sum_{k,m=1}^{K_{\mathcal{A}}, K_{\mathcal{B}}} n_{km}^2 \right) \\
 448 \quad N_{00} &= \binom{N}{2} - N_{11} - N_{10} - N_{01}. \\
 449
 \end{aligned}$$

| $\mathcal{A} / \mathcal{B}$ | $B_1$                  | $B_2$                  | ...      | $B_{K_{\mathcal{B}}}$                | Sums                   |
|-----------------------------|------------------------|------------------------|----------|--------------------------------------|------------------------|
| $A_1$                       | $n_{11}$               | $n_{12}$               | ...      | $n_{1K_{\mathcal{B}}}$               | $a_1$                  |
| $A_2$                       | $n_{21}$               | $n_{22}$               | ...      | $n_{2K_{\mathcal{B}}}$               | $a_2$                  |
| $\vdots$                    | $\vdots$               | $\vdots$               | $\ddots$ | $\vdots$                             | $\vdots$               |
| $A_{K_{\mathcal{A}}}$       | $n_{K_{\mathcal{A}}1}$ | $n_{K_{\mathcal{A}}2}$ | ...      | $n_{K_{\mathcal{A}}K_{\mathcal{B}}}$ | $a_{K_{\mathcal{A}}}$  |
| Sums                        | $b_1$                  | $b_2$                  | ...      | $b_{K_{\mathcal{B}}}$                | $\sum_{ij} n_{ij} = N$ |

**Table S1.** The contingency table  $\mathcal{T}$  for two clusterings  $\mathcal{A} = \{A_1, \dots, A_{K_{\mathcal{A}}}\}$  and  $\mathcal{B} = \{B_1, \dots, B_{K_{\mathcal{B}}}\}$  of  $N$  elements, where  $n_{ij} = |A_i \cap B_j|$  are the number of elements in both cluster  $A_i \in \mathcal{A}$  and cluster  $B_j \in \mathcal{B}$ .

450 The Rand index between clusterings  $\mathcal{A}$  and  $\mathcal{B}$ ,  $RI(\mathcal{A}, \mathcal{B})$  is then given by the function:

$$451 \quad RI(\mathbf{A}, \mathbf{B}) = \frac{N_{11} + N_{00}}{\binom{N}{2}}. \quad (S2)$$

452

453 It lies between 0 and 1, where 1 indicates the clusterings are identical and 0 occurs for clusters which do not share a  
 454 single pair of elements (this only happens when one clustering is the full set of elements and the other clustering groups  
 455 each element into its own singleton cluster). As the number of elements being clustered becomes large, the measure  
 456 becomes dominated by the number of pairs which were classified into different clusters ( $N_{00}$ ), resulting in decreased  
 457 sensitivity to co-occurring element pairs<sup>3</sup>.

## 458 S2.2 Adjusted Rand index (ARI)

459 A popular extension of the Rand index, called the adjusted Rand index (ARI), considers the average of the measure  
 460 in the context of the permutation model for random clusterings<sup>4-6</sup>. In the permutation model the number and size  
 461 of clusters within a clustering are fixed; all random clusterings are generated by shuffling the elements between the  
 462 fixed clusters. The expectation of the Rand index with respect to the permutation model follows from the fact that the  
 463 entries in Table S1 follow a generalized hypergeometric distribution. Taking  $Q^{\mathcal{A}} = \sum_{k=1}^{K_{\mathcal{A}}} \binom{a_k}{2}$  and  $Q^{\mathcal{B}} = \sum_{m=1}^{K_{\mathcal{B}}} \binom{b_m}{2}$ , the  
 464 expectation  $\mathbb{E}_{perm}[RI(\mathcal{A}, \mathcal{B})]$  of the Rand index with respect to the permutation model for the cluster size sequences of  
 465 clusterings  $\mathcal{A}$  and  $\mathcal{B}$  is given by:

$$466 \quad \mathbb{E}_{perm}[RI(\mathcal{A}, \mathcal{B})] = \frac{Q^{\mathcal{A}} Q^{\mathcal{B}} - \binom{N}{2} (Q^{\mathcal{A}} + Q^{\mathcal{B}}) + \binom{N}{2}^2}{\binom{N}{2}^2} \quad (S3)$$

467

468 (see Fowlkes and Mallows<sup>3</sup>, Hubert and Arabie<sup>4</sup>, or Albatineh and Niewiadomska-Bugaj<sup>5</sup> for the full derivation).  
 469 Finally, the ARI between clusterings  $\mathcal{A}$  and  $\mathcal{B}$  is given by:

$$470 \quad ARI(\mathcal{A}, \mathcal{B}) = \frac{R(\mathcal{A}, \mathcal{B}) - \mathbb{E}_{perm}[RI(\mathcal{A}, \mathcal{B})]}{1 - \mathbb{E}_{perm}[RI(\mathcal{A}, \mathcal{B})]} \quad (S4)$$

471

## 472 S2.3 Omega index

473 The Omega index extends the adjusted Rand index to compare overlapping clusterings<sup>7</sup>. To formulate the extension,  
 474 notice that in the presence of overlaps, element pairs can repeatedly occur within the same cluster. We consider  $t_j(\mathcal{A})$   
 475 the set of node pairs which co-occur exactly  $j$  times in clustering  $\mathcal{A}$ . The unadjusted Omega index between two  
 476 overlapping clusterings is then:

$$477 \quad \omega_u(\mathcal{A}, \mathcal{B}) = \frac{1}{\binom{N}{2}} \sum_j |t_j(\mathcal{A}) \cap t_j(\mathcal{B})|, \quad (S5)$$

478 while the expectation of this measure with respect to the permutation model on the number of element pair overlaps is:

$$479 \quad \mathbb{E}_{perm}[\omega_u(\mathcal{A}, \mathcal{B})] = \frac{1}{\binom{N}{2}^2} \sum_j |t_j(\mathcal{A})| \cdot |t_j(\mathcal{B})| \quad (S6)$$

480 Finally, the Omega index between two overlapping partitions is given by:

$$481 \quad \Omega(\mathcal{A}, \mathcal{B}) = \frac{\omega_u(\mathcal{A}, \mathcal{B}) - \mathbb{E}_{perm}[\omega_u(\mathcal{A}, \mathcal{B})]}{1 - \mathbb{E}_{perm}[\omega_u(\mathcal{A}, \mathcal{B})]}. \quad (S7)$$

482 Note that for partitions the Omega index is equivalent to the adjusted Rand index.

## 483 S2.4 Jaccard index

484 Another popular clustering similarity measure which utilizes pair-wise co-occurrence between the elements is the  
485 Jaccard index or Jaccard similarity coefficient<sup>8</sup>. Originally proposed to compare regional floras<sup>9</sup>, the Jaccard index  
486 is a similarity measure for finite sets. It is defined as the number of element pairs which are grouped in the same  
487 cluster in both clusterings divided by the number of element pairs which are grouped in the cluster in at least one of the  
488 clusterings. Thus, it ignores the number of element pairs that are grouped into different clusters by both clusterings.  
489 One minus the Jaccard index is a metric on the collection of finite sets<sup>10</sup>. Using the above notation from the contingency  
490 table Table S1, the Jaccard index between clusterings  $\mathcal{A}$  and  $\mathcal{B}$  takes the form:

$$491 \quad J(\mathcal{A}, \mathcal{B}) = \frac{N_{11}}{N_{11} + N_{10} + N_{01}} \quad (S8)$$

492

## 493 S2.5 F measure

494 The F measure has a long history of use in clustering validation, natural language processing, information retrieval, and  
495 machine learning. It is based off of two asymmetric measures (sometimes called Dice's asymmetric coefficients), that  
496 count the proportion of element pairs which are correctly co-assigned to the same cluster in one of the clusterings using  
497 the other clustering as a baseline. When one of these clusterings is considered to be a ground-truth clustering, these  
498 asymmetric measures are known as *precision* and *recall*. The F measure is the harmonic mean of the precision and  
499 recall. Specifically, the F measure between clusterings  $\mathcal{A}$  and  $\mathcal{B}$  is given by:

$$500 \quad F(\mathcal{A}, \mathcal{B}) = \frac{2N_{11}}{2N_{11} + N_{10} + N_{01}} \quad (S9)$$

501

502 The F measure  $F$  and Jaccard index  $J$  are related by  $J = F/(2 - F)$ .

## 503 S2.6 Fowlkes-Mallows index

504 The Fowlkes-Mallows index was first introduced to facilitate the comparison of hierarchical dendrograms<sup>3</sup>. The idea is  
505 to cut the dendrogram at each merger and compare the induced flat clusterings. Like the previous five measures, the  
506 Fowlkes-Mallows index is based on counting the pair-wise co-occurrence between the elements in the two clusterings:

$$507 \quad FM(\mathcal{A}, \mathcal{B}) = \frac{N_{11}}{\sqrt{(N_{11} + N_{10})(N_{11} + N_{01})}}. \quad (S10)$$

508 Applying this index to each cut  $k$  of two dendrograms produces a curve of comparisons between two clusterings each  
509 with  $k$  clusters.

## 510 S2.7 Percentage Matching

511 The Percentage Matching is based on the idea that each cluster should be compared to only one other cluster, its "best  
512 match"<sup>11</sup>. Specifically, let  $K_{\min} = \min(K_{\mathcal{A}}, K_{\mathcal{B}})$ , then the percentage matching index is defined using the contingency  
513 table:

$$514 \quad PM(\mathcal{A}, \mathcal{B}) = 1 - \frac{1}{N} \sum_{k=1}^{K_{\min}} \max_{\pi} n_{k,\pi}. \quad (S11)$$

515 where the notation  $\max_{\pi}$  denotes finding the cluster  $\pi$  with the largest overlap to cluster  $k$ . The percentage matching is  
516 equal to one minus the Purity Index, another common measure of the distance between clusterings.

## 517 S2.8 Normalized mutual information (NMI)

518 Another family of approaches for finding the similarity of two cluster coverings is based on the amount of information  
519 in each covering and the amount of information one covering contains about the other. These quantities can also be  
520 calculated from the contingency Table S1. The entropy  $H$  of a clustering  $\mathcal{A}$  is given by

$$521 \quad H(\mathcal{A}) = - \sum_{k=1}^{K_{\mathcal{A}}} \frac{a_k}{N} \log \frac{a_k}{N} \quad (S12)$$

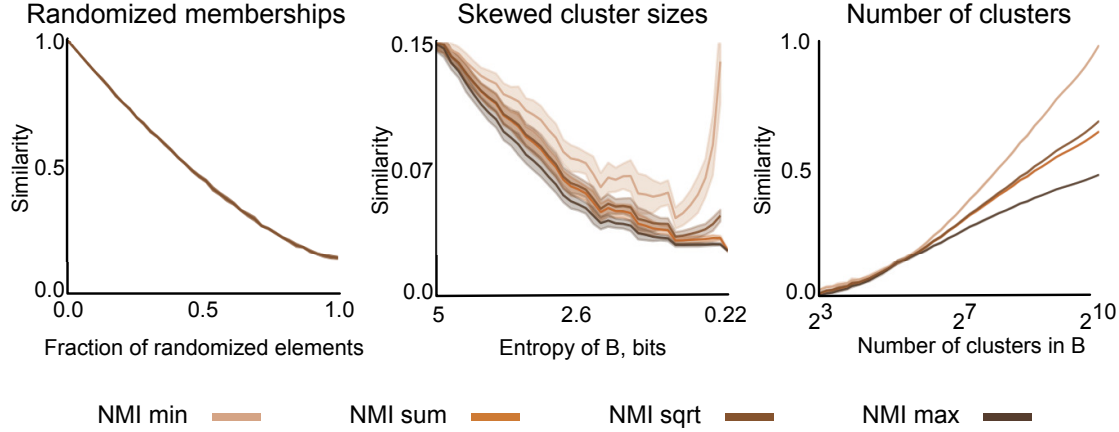

**Figure S1.** NMI's bias towards the number of clusters is independent of normalization term. The three scenarios from the main text, for different normalization terms of NMI: the minimum of cluster entropies (min), the average of the cluster entropies (sum), the geometric mean of the cluster entropies (sqrt), and the maximum of the cluster entropies (max). See Section S2.8 for the measure details.

522 and, using the entries  $n_{km}$  from the contingency table S1, the joint entropy between two clusterings  $\mathcal{A}$  and  $\mathcal{B}$  is

$$523 \quad H(\mathcal{A}, \mathcal{B}) = - \sum_{k,m=1}^{K_{\mathcal{A}}, K_{\mathcal{B}}} \frac{n_{km}}{N} \log \frac{n_{km}}{N} \quad (S13)$$

524 Thus, the mutual information between two clusterings is given by:

$$525 \quad \begin{aligned} MI(\mathcal{A}, \mathcal{B}) &= H(\mathcal{A}) + H(\mathcal{B}) - H(\mathcal{A}, \mathcal{B}) \\ 526 \quad &= \sum_{k,m=1}^{K_{\mathcal{A}}, K_{\mathcal{B}}} \frac{n_{km}}{N} \log \frac{n_{km}N}{a_k b_m}. \end{aligned} \quad (S14)$$

528 The mutual information can be interpreted as an inverse measure of independence between the clusterings, or a measure  
529 of the amount of information each clustering has about the other. As it can vary in the range  $[0, \min\{H(\mathcal{A}), H(\mathcal{B})\}]$ , to  
530 facilitate comparisons, it is desirable to normalize it to the range  $[0, 1]$ . There are at least six proposals in the literature  
531 for this upper bound, each with different advantages and drawbacks;

$$532 \quad \begin{aligned} \min\{H(\mathcal{A}), H(\mathcal{B})\} &\leq \sqrt{H(\mathcal{A})H(\mathcal{B})} \leq \frac{H(\mathcal{A}) + H(\mathcal{B})}{2} \\ 533 \quad &\leq \max\{H(\mathcal{A}), H(\mathcal{B})\} \leq \max\{\log K_{\mathcal{A}}, \log K_{\mathcal{B}}\} \leq \log N. \end{aligned} \quad (S15)$$

535 The resulting measures are all known as normalized mutual information (NMI). Here, we always use the average of the  
536 two clustering entropies  $\frac{1}{2}(H(\mathcal{A}) + H(\mathcal{B}))$ . Although some results have been shown to depend on the normalization  
537 term used for NMI, Figure S1 demonstrates that NMI behaves un-intuitively regardless of the normalization term.

538 Due to the known bias of NMI towards clusterings with more clusters, several modifications have been proposed.  
539 The NMI can be adjusted for chance according to an appropriate random model<sup>6,12</sup>, but this induces the problem  
540 of selecting a random model for the clusterings, and does not remove the issue of selecting a normalization term.  
541 Alternatively, the NMI can be re-scaled by an exponential factor reflecting the difference in number of clusters between  
542 the two clusterings, but this scaling factor forces the researcher to prioritize one clustering as the 'ground-truth' and  
543 breaks the symmetry of the original measure<sup>13</sup>.

## 544 **S2.9 Overlapping NMI (ONMI)**

545 The NMI has been modified to account for clusterings with overlapping clusters<sup>14</sup>. Consider a clustering  $\mathcal{A}$  with  $K_{\mathcal{A}}$   
 546 possibly overlapping clusters  $A_1, \dots, A_{K_{\mathcal{A}}}$ . For each cluster  $A_k$ , we can consider a binary random variable  $X_k$  which  
 547 represents the probability that a randomly selected node is a member of that cluster with distribution

$$548 \quad P(X_k = 1) = \frac{a_k}{N}, \quad P(X_k = 0) = 1 - \frac{a_k}{N} \quad (\text{S16})$$

549 The same holds for a second clustering  $\mathcal{B}$  with  $K_{\mathcal{B}}$  possibly overlapping clusters  $B_1, \dots, B_{K_{\mathcal{B}}}$  and random variables  $Y_m$ .  
 550 We can then define the joint probability distribution  $P(X_k, Y_m)$ :

$$551 \quad P(X_k = 1, Y_m = 1) = \frac{n_{km}}{N}$$

$$552 \quad P(X_k = 0, Y_m = 0) = 1 - \frac{n_{km}}{N} \quad (\text{S17})$$

$$553 \quad P(X_k = 1, Y_m = 0) = \frac{a_k - n_{km}}{N}$$

$$554 \quad P(X_k = 0, Y_m = 1) = \frac{b_m - n_{km}}{N}$$

556 Given a particular cluster  $A_k \in \mathcal{A}$ , the amount of information it has about another cluster  $B_m \in \mathcal{B}$  is found by the  
 557 conditional entropy

$$558 \quad H(X_k|Y_m) = H(X_k, Y_m) - H(Y_m). \quad (\text{S18})$$

559 In the case of overlapping clusters, there are many possible candidates for the best match between two clusters. The  
 560 best match is the one with the minimal conditional entropy. Thus, the conditional entropy of  $X_k$  with respect to all of  
 561 the clusters in  $\mathcal{B}$  is

$$562 \quad H(X_k|\mathbf{Y}) = \min_{m \in \{1, \dots, M\}} H(X_k|Y_m). \quad (\text{S19})$$

563 However, in minimizing the entropy it may be the case that the optimal  $B_m^*$  is the complement of  $A_k$ , thus we have to  
 564 add the following constraint to insure the above minimization identities the best matching cluster:

$$565 \quad h[P(1, 1)] + h[P(0, 0)] > h[P(0, 1)] + h[P(1, 0)]. \quad (\text{S20})$$

566 This entropy is normalized by the entropy of  $X_k$  and averaged over all  $X_k$  to give the normalized conditional entropy of  
 567  $\mathbf{X}$  with respect to  $\mathbf{Y}$

$$568 \quad H(\mathbf{X}|\mathbf{Y})_{\text{norm}} = \frac{1}{K} \sum_{k=1}^K \frac{H(X_k|\mathbf{Y})}{H(X_k)}. \quad (\text{S21})$$

569 Finally, the overlapping normalized mutual information ONMI is given by

$$570 \quad ONMI(\mathcal{A}, \mathcal{B}) = 1 - \frac{1}{2} [H(\mathbf{X}|\mathbf{Y})_{\text{norm}} + H(\mathbf{Y}|\mathbf{X})_{\text{norm}}]. \quad (\text{S22})$$

571 It is interesting to note that when  $\mathcal{A}$  and  $\mathcal{B}$  are partitions, the  $NMI(\mathcal{A}, \mathcal{B})$  and  $ONMI(\mathcal{A}, \mathcal{B})$  do not necessarily  
 572 agree. Although there have been several attempts to reformulate ONMI so that it agrees with NMI, the above formulation  
 573 is pervasive in the literature<sup>15-17</sup>.

## 574 **S2.10 Variation of Information VI**

575 Another popular clustering comparison measure based on information theory is the Variation of Information (VI). Unlike  
 576 the similarity measures discussed above, the VI is a metric on the lattice of partitions<sup>18</sup>. Thus, it is a measure of distance  
 577 between clusterings instead of a similarity between the clusterings; it attains its minimum at 0 when the clusterings are

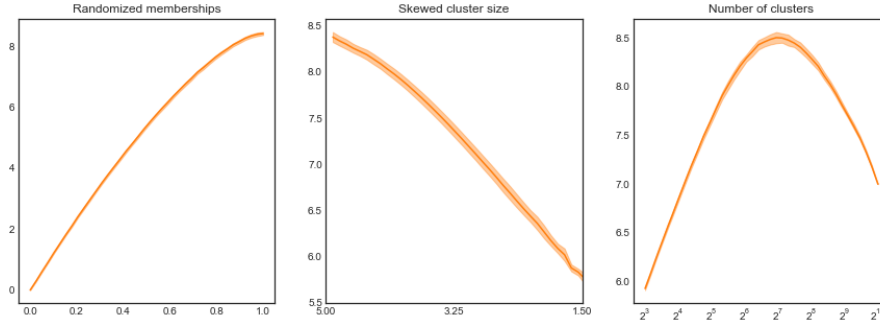

**Figure S2.** VI unintuitive behavior as the cluster sizes become more skewed and as the number of clusters is increased. Note that because the VI is a distance measure, the intuitive behavior is opposite that presented for similarity measures.

578 identical, and attains positive values for clusterings which differ. Using the entropy and mutual information between  
 579 clusterings defined in Section S2.8, the VI is given by:

$$\begin{aligned}
 580 \quad VI(\mathcal{A}, \mathcal{B}) &= H(\mathcal{A}) + H(\mathcal{B}) - 2MI(\mathcal{A}, \mathcal{B}) \\
 581 \quad &= 2H(\mathcal{A}, \mathcal{B}) - H(\mathcal{A}) - H(\mathcal{B}). \tag{S23}
 \end{aligned}$$

582  
 583 Since the VI is a distance measure, the intuitive behavior is opposite that presented for the similarity measures  
 584 discussed in this paper, and presented in the main text, Figure 2. None-the-less, we can demonstrate that the VI suffers  
 585 from unintuitive behavior in two scenarios: the skewed cluster sizes and the number of clusters (Figure S2).

### 586 S2.11 Information Theoretic Intuition

587 A second intuition that could be used to evaluate clustering similarity measures is based on concepts drawn from  
 588 information theory. Under this intuition, the appropriate question to ask is: “Given a random element, how much  
 589 uncertainty remains about its membership in Clustering  $\mathcal{B}$  if I know its membership in Clustering  $\mathcal{A}$ ?” The clusters  
 590 are now considered as an alphabet and the contingency table is considered as a discrete probability distribution over  
 591 this alphabet. For example, the variation of information considers the difference in conditional entropies reflecting the  
 592 amount of information we loose about the original cluster assignment, and the amount of information we have to gain to  
 593 recover the new cluster assignment when going from one clustering to the other<sup>18</sup>. The resulting intuition suggests that  
 594 two clusterings are similar if one doesn’t loose much information (presence of equally sized clusters) or one doesn’t  
 595 have to gain much information (presence of very small clusters). Consequently, in Figure S2, we notice that the VI  
 596 decreases (more similar) as the cluster entropy decreases, and displays a parabolic shape (more similar, to less similar,  
 597 to more similar) as the number of clusters approaches the number of elements.

598 Our main objection to the information theoretic intuition is that it tends to suggest measures cannot differentiate the  
 599 influence of alphabet size (here, number of clusters) from the distribution of alphabet usage (here, sizes of the clusters).  
 600 Furthermore, the primary justification for these measures is typically stated with respect to the alignment to the lattice  
 601 of partitions<sup>19</sup>, yet, it is not immediately clear if the lattice of partitions is the appropriate space to compare clustering  
 602 similarity measures since many applications do not align to the lattice (i.e. evaluation of k-means clustering fixes the  
 603 number of clusters).

## 604 S3 Datasets

### 605 S3.1 Point clusters

606 5,000 points were random formed into clusters in an algorithm akin to the process for constructing benchmark graphs<sup>20</sup>.  
 607 Cluster sizes were randomly drawn from a powerlaw distribution with a minimum cluster size of 10, a maximum cluster  
 608 size of 1000, and an exponent of 1.0. The center of those clusters was uniformly selected from points in a  $40 \times 40$   
 609 box. The standard deviation (or spread) of each cluster was also drawn from a powerlaw distribution with a minimum

610 of 0.2, a maximum of 2.0, and an exponent of 1.0. Next, the type of each cluster was uniformly selected from four  
611 options. The first option is the 2-D Gaussian blob with mean given by the cluster center and standard deviation given by  
612 the cluster standard deviation. The second option is the 2-D Anisotropic blob with a mean given by the cluster center,  
613 standard deviation given by the cluster standard deviation, and transformation given by the rotational matrix:

$$614 \quad \begin{bmatrix} a \cos(\theta) & -a \sin(\theta) \\ b \sin(\theta) & b \cos(\theta) \end{bmatrix}, \quad (\text{S24})$$

615 where  $a, b$  randomly drawn from the unit interval and  $\theta$  was randomly drawn from the range  $[0, \pi]$ . The third option is  
616 the circle centered at the cluster center with radius given by the cluster standard deviation; the points were uniformly  
617 spread along the circle and Gaussian noise with mean 0 and standard deviation 0.2 was added to all points. The  
618 fourth option is the spiral with points uniformly spread in the range  $[0, 10]$ , converted to circular coordinates by  
619  $(x, y) \rightarrow (\sigma \sqrt{x} \cos(x), \sigma \sqrt{y} \cos(y))$ , where  $\sigma$  is the cluster standard deviation, randomly rotated by the rotation matrix  
620 of equation (S24) with  $a = b = 1$  and  $\theta$  randomly drawn from the range  $[0, \pi]$ , and Gaussian noise with mean 0 and  
621 standard deviation 0.2 was added to all points.

622 The sci-kit learn<sup>21</sup> implementation of  $K$ -means clustering was initialized with  $K = 19$  clusters and random initial  
623 centroids. The identification method was then run from 100 random centroid initializations. Clustering agreement was  
624 calculated by comparing all 100 uncovered clusterings with the ground-truth clustering using the element-wise similarity  
625 vector was found for each comparison and then averaged over the uncovered clusterings. Clustering frustration was  
626 calculated from all pair-wise comparisons between the 100 uncovered clusterings using the element-wise similarity  
627 vector was found for each comparison and then averaged over each comparison.

### 628 **S3.2 Handwriting digits**

629 The digits data set, originally assembled by Alimoglu and Alpaydin<sup>22</sup>, is bundled with the<sup>21</sup> source code. It consists of  
630 1797 images of  $8 \times 8$  gray level pixels for handwritten digits distributed across 10 clusters corresponding to the true  
631 digit. To provide a visualization, the data was projected to 2-d using the t-Distributed Stochastic Neighbor Embedding  
632 (t-SNE) dimensionality reduction method<sup>23</sup> initialized from the pca decomposition.

633 The sci-kit learn<sup>21</sup> implementation of  $K$ -means clustering was initialized with  $K = 10$  clusters and random initial  
634 centroids. The identification method was then run from 100 random centroid initializations. Clustering agreement was  
635 calculated by comparing all 100 uncovered clusterings with the ground-truth clustering using the element-wise similarity  
636 vector was found for each comparison and then averaged over the uncovered clusterings. Clustering frustration was  
637 calculated from all pair-wise comparisons between the 100 uncovered clusterings using the element-wise similarity  
638 vector was found for each comparison and then averaged over each comparison.

### 639 **S3.3 Brain networks**

640 The dataset used here was originally analyzed in Cheng et al.<sup>24</sup>; please refer to that work for specific details of the data  
641 acquisition and pre-processing, here we only provide a brief overview.

642 Data was acquired from 19 individuals diagnosed with schizophrenia (6 female, mean age  $33.1 \pm 10.9$  years) and  
643 29 healthy controls (15 female, mean age  $28.1 \pm 8.4$  years). Diagnosis of schizophrenia was based on the Structured  
644 Clinical Interview for the DSM-IV Axis I Disorders (SCID-I)<sup>25</sup> and medical chart review. All subjects were scanned  
645 on a Siemens TIM Trio 3 T MRI scanner using a 32-channel head coil. The high anatomical scan had a resolution  
646 of  $1 \text{ mm}^3$ . A total of 200 volumes of resting state fMRI data were acquired with EPI sequences for 8 min and 20s.  
647 During the resting state fMRI scan, the subjects were at rest with eyes closed and instructed not to think of anything in  
648 particular. All functional data were motion corrected in FSL.

649 In conjunction with the anatomical image, the functional images were parcellated using a parcellation scheme  
650 proposed by Shen et al.<sup>26</sup>. This parcellation divides the cerebral cortex into 278 regions of interest (ROIs), and was  
651 derived from resting state functional data of the healthy subjects by maximizing functional homogeneity within each  
652 ROI. After regressing out head motion, the time signal was band-pass filtered between 0.01 – 0.10 Hz and the time  
653 courses were extracted from the 278 brain ROIs as the average over voxels.

654 The functional network was computed from the wavelet coherence between all pair-wise combinations of ROIs,  
655 giving rise to a square symmetric matrix ( $278 \times 278$ ). The resulting functional connectivity matrix has only positive  
656 edges. In order to identify a backbone network structure, the multiscale network backbone<sup>27</sup> was extracted using an



657 alpha of  $\alpha = 0.2$ . Technically, the multiscale backbone is a directed network, however, since our original graph was  
658 undirected, we convert the multiscale backbone back into an undirected network. The network was not corrected to  
659 insure a single connected component.

660 Overlapping and hierarchically structured clusterings were derived using Order Statistics Local Optimization  
661 Method (OSLOM) network community detection<sup>28</sup> with the following parameters: weighted, undirected edges,  $p = 0.1$ ,  
662 100 runs for the detection at the bottom of the hierarchy and 1000 runs for the detection at the top of the hierarchy. All  
663 singlet communities were kept in the clusterings. Due to the variability in clustering structure between runs of the  
664 algorithm, 10 clusterings were extracted for each patient.

665 The subject similarity matrix was then constructed as follows. The similarity of each diagonal entry is 1.0. Each  
666 off-diagonal entry in the  $(48 \times 48)$  subject similarity matrix is the average element-centric similarity similarity of all  
667 comparisons  $10 \times 10 = 100$  between the 10 OSLOM communities uncovered for each subject. For all comparisons, we  
668 set  $\alpha = 0.9$  and  $r = 8.0$ . Our choice of the scaling parameter,  $r = 8.0$ , was grounded in the explorations of synthetic  
669 binary hierarchies of equivalent height. The dis-similarity matrix is one minus the similarity matrix. Six additional  
670 matrices were found by using the community structure found by slicing each OSLOM community dendrogram and  
671 retaining only the bottom or top communities and performing all pair-wise comparisons with either our element-centric  
672 similarity measure, ONMI or the Omega index. Note that we use only these three measure of similarity because the  
673 communities contain many overlapping structures.

674 Given a dis-similarity matrix, a distance weighted k-Nearest Neighbors (kNN) classifier was trained using nested  
675 and stratified 10-fold validation<sup>29</sup>. Specifically, the data was randomly split into 10 groups such that the proportions of  
676 each class were kept relatively equal in each group. Each group in turn was then used as the testing set, while the other  
677 9 groups formed the training set. For each training set, we first find the best  $k$  for the kNN classifier using a grid search  
678 for  $k$  between 1 and 15 and another stratified 10-fold validation. The classifier was then retrained on the entire training  
679 set for the specified  $k$ . Finally, the accuracy of the trained classifier was found on the testing set. In the paper, we report  
680 the average accuracy identified in 100 random initializations of the nested 10-fold validation technique<sup>30,31</sup>.

## 681 References

- 682 1. Gates, A. J. & Ahn, Y.-Y. Clusim: a python package for calculating clustering similarity. *J. Open Source Softw.* **4**,  
683 1264 (2019).
- 684 2. Rand, W. M. Objective Criteria for the Evaluation of Clustering Methods. *J. Am. Stat. Assoc.* **66**, 846 (1971).
- 685 3. Fowlkes, E. B. & Mallows, C. L. A method for comparing two hierarchical clusterings. *J. Am. Stat. Assoc.* **78**,  
686 553–569 (1983).
- 687 4. Hubert, L. & Arabie, P. Comparing partitions. *J. Classif.* **2**, 193–218 (1985).
- 688 5. Albatineh, A. N., Niewiadomska-Bugaj, M. & Mihalko, D. On similarity indices and correction for chance  
689 agreement. *J. Classif.* **23**, 301–313 (2006).
- 690 6. Gates, A. J. & Ahn, Y.-Y. The impact of random models on clustering similarity. *J. Mach. Learn. Res.* **18**, 1–28  
691 (2017).
- 692 7. Collins, L. M. & Dent, C. W. Omega: A general formulation of the rand index of cluster recovery suitable for  
693 non-disjoint solutions. *Multivar. Behav. Res.* **23**, 231–242 (1988).
- 694 8. Ben-Hur, A., Elisseeff, A. & Guyon, I. A stability based method for discovering structure in clustered data. In  
695 *Pacific Symposium on Biocomputing*, 6–17 (2002).
- 696 9. Jaccard, P. The distribution of the flora in the alpine zone. *New Phytol.* **11**, 37–50 (1912).
- 697 10. Marczewski, E. & Steinhaus, H. On a certain distance of sets and the corresponding distance of functions.  
698 *Colloquium Math.* **6**, 319–327 (1958).
- 699 11. Meila, M. & Heckerman, D. An experimental comparison of model-based clustering methods. *Mach. Learn.* **42**,  
700 9–29 (2001).
- 701 12. Vinh, N. X., Epps, J. & Bailey, J. Information theoretic measures for clusterings comparison: is a correction for  
702 chance necessary? In *Proceedings of the 26th Annual International Conference on Machine Learning*, 1073–1080  
703 (ACM, 2009).

- 704 **13.** Amelio, A. & Pizzuti, C. Is normalized mutual information a fair measure for comparing community detection  
705 methods? In *Proceedings of the 2015 IEEE/ACM International Conference on Advances in Social Networks  
706 Analysis and Mining 2015*, 1584–1585 (ACM, 2015).
- 707 **14.** Lancichinetti, A., Fortunato, S. & Kertesz, J. Detecting the overlapping and hierarchical community structure in  
708 complex networks. *New J. Phys.* **11**, 033015 (2009).
- 709 **15.** Esquivel, A. V. & Rosvall, M. Comparing network covers using mutual information. *arXiv preprint arXiv:1202.0425*  
710 (2012).
- 711 **16.** Xie, J., Kelley, S. & Szymanski, B. K. Overlapping community detection in networks: The state-of-the-art and  
712 comparative study. *ACM Comput. Surv. (csur)* **45**, 43 (2013).
- 713 **17.** Hric, D., Darst, R. K. & Fortunato, S. Community detection in networks: Structural communities versus ground  
714 truth. *Phys. Rev. E* **90**, 062805 (2014).
- 715 **18.** Meilă, M. Comparing clusterings by the variation of information. In *Learning Theory and Kernel Machines*,  
716 173–187 (Springer, 2003).
- 717 **19.** Meila, M. Comparing clusterings: an axiomatic view. In *Proceedings of the 22nd International Conference on  
718 Machine Learning*, 577–584 (ACM, New York, NY, USA, 2005).
- 719 **20.** Lancichinetti, A. & Fortunato, S. Community detection algorithms: a comparative analysis. *Phys. Rev. E* **80**,  
720 056117 (2009).
- 721 **21.** Pedregosa, F. *et al.* Scikit-learn: Machine learning in Python. *J. Mach. Learn. Res.* **12**, 2825–2830 (2011).
- 722 **22.** Alimoglu, F. & Alpaydin, E. Methods of combining multiple classifiers based on different representations for  
723 pen-based handwritten digit recognition. In *Proceedings of the Fifth Turkish Artificial Intelligence and Artificial  
724 Neural Networks Symposium* (1996).
- 725 **23.** Van der Maaten, L. & Hinton, G. Visualizing data using t-sne. *J. Mach. Learn. Res.* **9**, 85 (2008).
- 726 **24.** Cheng, H. *et al.* Nodal centrality of functional network in the differentiation of schizophrenia. *Schizophr. Res.* **168**,  
727 345–352 (2015).
- 728 **25.** First, M. B. *Structured clinical interview for DSM-IV-TR Axis I disorders: Patient edition* (Biometrics Research  
729 Department, Columbia University, 2005).
- 730 **26.** Shen, X., Tokoglu, F., Papademetris, X. & Constable, R. T. Groupwise whole-brain parcellation from resting-state  
731 fmri data for network node identification. *Neuroimage* **82**, 403–415 (2013).
- 732 **27.** Serrano, M. A., Boguna, M. & Vespignani, A. Extracting the multiscale backbone of complex weighted networks.  
733 *PNAS* **106**, 6483–6488 (2009).
- 734 **28.** Lancichinetti, A., Radicchi, F., Ramasco, J. J. & Fortunato, S. Finding Statistically Significant Communities in  
735 Networks. *PLoS ONE* **6**, e18961 (2011).
- 736 **29.** Hastie, T., Tibshirani, R. & Friedman, J. *The elements of statistical learning*. NY Springer (2001).
- 737 **30.** Stone, M. Cross-validated choice and assessment of statistical predictions. *J. Royal Stat. Soc. Ser. B (Methodolog-  
738 ical)* 111–147 (1974).
- 739 **31.** Rao, R. B., Fung, G. & Rosales, R. On the dangers of cross-validation. an experimental evaluation. In *SDM*,  
740 588–596 (SIAM, 2008).
